# Supplementary material for: Synthesis, structures and magnetic properties of four dysprosium-based complexes with a multidentate ligand with steric constraint
Source: Royal Society of Chemistry journal article supplement (doi:10.1039/d2ce01201d), 2022-12-23
Supplement: d2ce01201d1.pdf [file d2ce01201d1.pdf]

Electronic Supplementary Material (ESI) for CrystEngComm.  
This journal is © The Royal Society of Chemistry 2022

## **SUPPORTING INFORMATION**

### **Synthesis, structures and magnetic properties of four Dysprosium-based complexes with a multidentate ligand with steric constrain**

Wen-qiang Li, Meng-xia Ma, Qing-Ling Ni, Shi-Ming Li, Liu-Cheng Gui\* and Xiu-Jian Wang\*

## Solvents mask analyses.

Mask routine of Olex2 (similar to PLATON/QUEEZE) analyses estimate the electron count to be 126 within 734 Å<sup>3</sup> void per cell for **Dy**<sub>2</sub>, 70 within 306 Å<sup>3</sup> void per cell for **Dy**<sub>4</sub> and 280 within 1488 Å<sup>3</sup> void per cell for **Dy**<sub>6</sub>. Commonly, it is a feasible way to assign the diffuse solvent according to the electrons in the void as reported in ref. [1]. All complexes were obtained in the same solvent system (MeOH–MeCN). The TENTATIVE assignment of the solvents is described in detail as below.

### (1) Solvents assignment in **Dy**<sub>2</sub>.

The structure refinement of **Dy**<sub>2</sub> with a lower symmetry *P-1* and two formula units in one cell. The residual electron density was treated as diffuse contributions using the mask routine of Olex2 and located a series of voids with 126 electrons per cell, it might be possible that the formula unit includes two CH<sub>3</sub>CN molecules (22 e) and one CH<sub>3</sub>OH molecules (18 e). These solvent molecules assigned are in line with the result by elemental analysis. The tentative formula is [Dy<sub>2</sub>(H<sup>py</sup>L)(L)(CH<sub>3</sub>COO)]·2CH<sub>3</sub>CN·CH<sub>3</sub>OH (**Dy**<sub>2</sub>·2CH<sub>3</sub>CN·CH<sub>3</sub>OH).

### (2) Solvents assignment in **Dy**<sub>4</sub>.

The structure refinement of **Dy**<sub>4</sub> with a lower symmetry *P-1* and one formula unit in one cell. The residual electron density was treated as diffuse contributions using the mask routine of Olex2 and located a series of voids with 70 electrons per cell, it might be possible that the formula unit includes four CH<sub>3</sub>OH molecules (72 e). These solvent molecules assigned are in line with the result by elemental analysis. The tentative formula is [Dy<sub>4</sub>(HL)<sub>2</sub>(u<sub>3</sub>-OH)<sub>2</sub>Cl<sub>6</sub>]·4CH<sub>3</sub>OH (**Dy**<sub>4</sub>·4CH<sub>3</sub>OH).

### (3) Solvents assignment in **Dy**<sub>6</sub>.

The structure refinement of **Dy**<sub>6</sub> with a higher symmetry *Pbca* and four formula units in one cell. The residual electron density was treated as diffuse contributions using the mask routine of Olex2 and located a series of voids with 280 electrons per cell, it might be possible that the formula unit includes four CH<sub>3</sub>OH molecules (72 e). These solvent molecules assigned are in line with the result by elemental analysis. The tentative formula is [Dy<sub>6</sub>(L)<sub>2</sub>(u<sub>3</sub>-OH)<sub>4</sub>(CH<sub>3</sub>COO)<sub>8</sub>]·4CH<sub>3</sub>OH (**Dy**<sub>6</sub>·4CH<sub>3</sub>OH).

[1] O. V. Dolomanov.; D. B. Cordes.; N. R. Champness.; A. J. Blake.; L. R. Hanton.; G. B. Jameson.; M. Schröder.; C. Wilson. *Chem. Commun.*, 2004, 642.

## Crystal Data Warnings and Replies

The B-alerts in **Dy<sub>2</sub>**:

PLAT910\_ALERT\_3\_B Missing # of FCF Reflection(s) Below Theta (Min).

Response: The missing FCF reflections below theta(min) were caused by the high beamstop theta(min) limit set.

PLAT971\_ALERT\_2\_B Check Calcd Resid. Dens. 0.95Ang From C2 2.58 eA<sup>-3</sup>

Response: This residual density in the structure is likely due to unsuitable absorption correction.

The B-alerts in **Dy<sub>4</sub>**:

PLAT910\_ALERT\_3\_B Missing # of FCF Reflection(s) Below Theta(Min).

Response: The missing FCF reflections below theta(min) were caused by the high beamstop theta(min) limit set.

The B-alerts in **Dy<sub>5</sub>**:

PLAT420\_ALERT\_2\_B D-H Bond Without Acceptor O8 --H8A.

Response: This problem may arise from the disordered nature of O8 and H8 atoms.

The B-alerts in **Dy<sub>6</sub>**:

PLAT910\_ALERT\_3\_B Missing # of FCF Reflection(s) Below Theta(Min).

Response: The missing FCF reflections below theta(min) were caused by the high beamstop theta(min) limit set.

## Contents.

|                                                                                                                                                                                                                                   |    |
|-----------------------------------------------------------------------------------------------------------------------------------------------------------------------------------------------------------------------------------|----|
| <b>Table S1.</b> Crystal Data and Structure Refinement for <b>Dy<sub>2</sub></b> , <b>Dy<sub>4</sub></b> , <b>Dy<sub>5</sub></b> and <b>Dy<sub>6</sub></b> . .....                                                                | 5  |
| <b>Fig. S1.</b> IR spectrum of H <sub>3</sub> L ligand. ....                                                                                                                                                                      | 5  |
| <b>Fig. S2.</b> <sup>1</sup> H NMR spectrum (CDCl <sub>3</sub> , 400 MHz) of H <sub>3</sub> L ligand in CDCl <sub>3</sub> . ....                                                                                                  | 5  |
| <b>Fig. S3.</b> IR spectrum of <b>Dy<sub>2</sub></b> . ....                                                                                                                                                                       | 6  |
| <b>Fig. S4.</b> IR spectrum of <b>Dy<sub>4</sub></b> . ....                                                                                                                                                                       | 6  |
| <b>Fig. S5.</b> IR spectrum of <b>Dy<sub>5</sub></b> . ....                                                                                                                                                                       | 7  |
| <b>Fig. S6.</b> IR spectrum of <b>Dy<sub>6</sub></b> . ....                                                                                                                                                                       | 7  |
| <b>Fig. S7.</b> Different coordination modes of H <sub>3</sub> L for complexes: (a) <b>Dy<sub>2</sub></b> ; (b) <b>Dy<sub>4</sub></b> ; (c) <b>Dy<sub>5</sub></b> ; (d) <b>Dy<sub>6</sub></b> . ....                              | 7  |
| <b>Fig. S8.</b> Coordination polyhedron surrounding of Dy(III) for <b>Dy<sub>2</sub></b> . ....                                                                                                                                   | 8  |
| <b>Fig. S9.</b> Coordination polyhedron surrounding of Dy(III) for <b>Dy<sub>4</sub></b> . ....                                                                                                                                   | 8  |
| <b>Fig. S10.</b> Coordination polyhedron surrounding of Dy(III) for <b>Dy<sub>5</sub></b> . ....                                                                                                                                  | 8  |
| <b>Fig. S11.</b> Coordination polyhedron surrounding of Dy(III) for <b>Dy<sub>6</sub></b> . ....                                                                                                                                  | 8  |
| <b>Fig. S12.</b> Powder X-ray diffraction pattern of <b>Dy<sub>2</sub></b> at room temperature, together with the calculated pattern from the single crystal data. ....                                                           | 9  |
| <b>Fig. S13.</b> Powder X-ray diffraction pattern of <b>Dy<sub>4</sub></b> at room temperature, together with the calculated pattern from the single crystal data. ....                                                           | 9  |
| <b>Fig. S14.</b> Powder X-ray diffraction pattern of <b>Dy<sub>5</sub></b> at room temperature, together with the calculated pattern from the single crystal data. ....                                                           | 9  |
| <b>Fig. S15.</b> Powder X-ray diffraction pattern of <b>Dy<sub>6</sub></b> at room temperature, together with the calculated pattern from the single crystal data. ....                                                           | 10 |
| <b>Fig. S16.</b> M versus H plots under different temperatures for <b>Dy<sub>2</sub></b> (a), <b>Dy<sub>4</sub></b> (b), <b>Dy<sub>5</sub></b> (c) and <b>Dy<sub>6</sub></b> (d). ....                                            | 10 |
| <b>Fig. S17.</b> M versus H T <sup>-1</sup> plots under different temperatures for <b>Dy<sub>2</sub></b> (a), <b>Dy<sub>4</sub></b> (b), <b>Dy<sub>5</sub></b> (c) and <b>Dy<sub>6</sub></b> (d). ....                            | 11 |
| <b>Fig. S18.</b> Frequency-dependent out-phase ( $\chi''$ ) ac susceptibilities under different dc fields for <b>Dy<sub>2</sub></b> (a), <b>Dy<sub>4</sub></b> (b), <b>Dy<sub>5</sub></b> (c) and <b>Dy<sub>6</sub></b> (d). .... | 11 |
| <b>Fig. S19.</b> Frequency-dependent in-phase ( $\chi'$ ) ac susceptibilities under different dc fields for <b>Dy<sub>2</sub></b> (a), <b>Dy<sub>4</sub></b> (b), <b>Dy<sub>5</sub></b> (c) and <b>Dy<sub>6</sub></b> (d). ....   | 12 |
| <b>Fig. S20.</b> Plots of in-phase ac susceptibilities ( $\chi'$ ) and out-of-phase ac susceptibilities ( $\chi''$ ) vs <i>T</i> at various frequencies under zero dc field for <b>Dy<sub>2</sub></b> . ....                      | 12 |
| <b>Fig. S21.</b> Plots of in-phase ac susceptibilities ( $\chi'$ ) and out-of-phase ac susceptibilities ( $\chi''$ ) vs <i>T</i> at various frequencies under zero dc field for <b>Dy<sub>4</sub></b> . ....                      | 12 |
| <b>Fig. S22.</b> Plots of in-phase ac susceptibilities ( $\chi'$ ) and out-of-phase ac susceptibilities ( $\chi''$ ) vs <i>T</i> at various frequencies under zero dc field for <b>Dy<sub>5</sub></b> . ....                      | 13 |
| <b>Fig. S23.</b> Plots of in-phase ac susceptibilities ( $\chi'$ ) and out-of-phase ac susceptibilities ( $\chi''$ ) vs <i>T</i> at various frequencies under zero dc field for <b>Dy<sub>6</sub></b> . ....                      | 13 |
| <b>Table S2.</b> Detailed analysis results of the Continuous Shape Measures (CShMs). ...                                                                                                                                          | 13 |
| <b>Table S3.</b> Selected bond lengths and bond angles for <b>Dy<sub>2</sub></b> . ....                                                                                                                                           | 13 |
| <b>Table S4.</b> Selected bond lengths and bond angles for <b>Dy<sub>4</sub></b> . ....                                                                                                                                           | 14 |
| <b>Table S5.</b> Selected bond lengths and bond angles for <b>Dy<sub>5</sub></b> . ....                                                                                                                                           | 15 |

**Table S6.** Selected bond lengths and bond angles for **Dy<sub>6</sub>**, ..... 16**Table S1.** Crystal Data and Structure Refinement for **Dy<sub>2</sub>**, **Dy<sub>4</sub>**, **Dy<sub>5</sub>** and **Dy<sub>6</sub>**.

|                                          | <b>Dy<sub>2</sub></b>                                                        | <b>Dy<sub>4</sub></b>                                                                      | <b>Dy<sub>5</sub></b>                                                        | <b>Dy<sub>6</sub></b>                                                         |
|------------------------------------------|------------------------------------------------------------------------------|--------------------------------------------------------------------------------------------|------------------------------------------------------------------------------|-------------------------------------------------------------------------------|
| Chemical formula                         | <b>C<sub>67</sub>H<sub>70</sub>Dy<sub>2</sub>N<sub>8</sub>O<sub>15</sub></b> | <b>C<sub>64</sub>H<sub>76</sub>Cl<sub>6</sub>Dy<sub>4</sub>N<sub>6</sub>O<sub>18</sub></b> | <b>C<sub>46</sub>H<sub>56</sub>Dy<sub>5</sub>N<sub>3</sub>O<sub>24</sub></b> | <b>C<sub>80</sub>H<sub>100</sub>Dy<sub>6</sub>N<sub>6</sub>O<sub>36</sub></b> |
| Formula weight                           | 1554.35                                                                      | 2082.25                                                                                    | 1853.97                                                                      | 2704.19                                                                       |
| Temperature/K                            | 293                                                                          | 293                                                                                        | 100                                                                          | 293                                                                           |
| Crystal system                           | triclinic                                                                    | triclinic                                                                                  | Monoclinic                                                                   | orthorhombic                                                                  |
| Space group                              | <b>PError!</b>                                                               | <b>PError!</b>                                                                             | P2 <sub>1</sub> /n                                                           | Pbca                                                                          |
| a(Å)                                     | 14.1814(5)                                                                   | 10.9250(3)                                                                                 | 10.9825                                                                      | 22.6360(3)                                                                    |
| b(Å)                                     | 15.2007(7)                                                                   | 11.2522(4)                                                                                 | 22.9575                                                                      | 16.7245(2)                                                                    |
| c(Å)                                     | 17.7267(6)                                                                   | 16.2537(5)                                                                                 | 23.0079                                                                      | 23.9473(3)                                                                    |
| α(°)                                     | 79.139(3)                                                                    | 96.322(3)                                                                                  | 90                                                                           | 90                                                                            |
| β(°)                                     | 89.186(3)                                                                    | 98.838(2)                                                                                  | 98.137(1)                                                                    | 90                                                                            |
| γ(°)                                     | 64.683(4)                                                                    | 111.745(3)                                                                                 | 90                                                                           | 90                                                                            |
| V (Å <sup>3</sup> )                      | 3382.9(3)                                                                    | 1803.23(11)                                                                                | 5742.60 (9)                                                                  | 9065.9(2)                                                                     |
| Z                                        | 2                                                                            | 1                                                                                          | 4                                                                            | 4                                                                             |
| ρ <sub>calcd</sub> (g cm <sup>-3</sup> ) | 1.4                                                                          | 1.799                                                                                      | 2.138                                                                        | 1.82                                                                          |
| F (000)                                  | 1365                                                                         | 942                                                                                        | 3504                                                                         | 4600                                                                          |
| Reflection collected                     | 51034                                                                        | 25793                                                                                      | 44436                                                                        | 40010                                                                         |
| Independent reflections                  | 15096 (Rint = 0.0630)                                                        | 7361 (Rint = 0.0451)                                                                       | 10117 (Rint = 0.0531)                                                        | 10761 (Rint = 0.0321)                                                         |
| GOF on F2                                | 1.116                                                                        | 1.052                                                                                      | 1.132                                                                        | 1.134                                                                         |
| R1a / wR2 b (I > 2σ(I))                  | 0.0626 / 0.1541                                                              | 0.0375/0.1061                                                                              | 0.0479/0.1204                                                                | 0.0532/0.1583                                                                 |
| R1/ wR2 (all data)                       | 0.1106 / 0.1941                                                              | 0.0529/0.1181                                                                              | 0.0528/0.1230                                                                | 0.0731/0.1749                                                                 |
| CCDC numbers                             | 2202411                                                                      | 2202419                                                                                    | 2204294                                                                      | 2204296                                                                       |

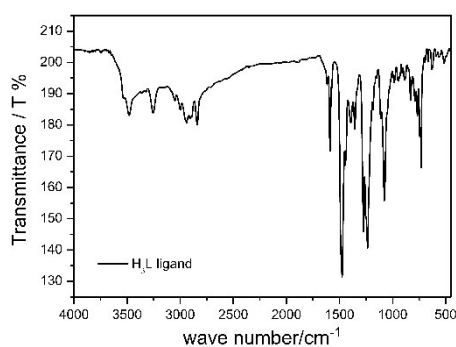**Fig. S1.** IR spectrum of H<sub>3</sub>L ligand.

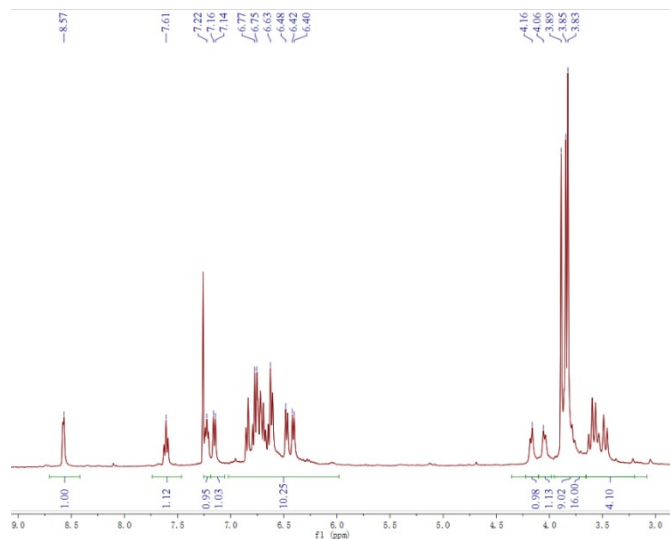

**Fig. S2.**  $^1\text{H}$  NMR spectrum ( $\text{CDCl}_3$ , 400 MHz) of  $\text{H}_3\text{L}$  ligand in  $\text{DCl}_3$ .

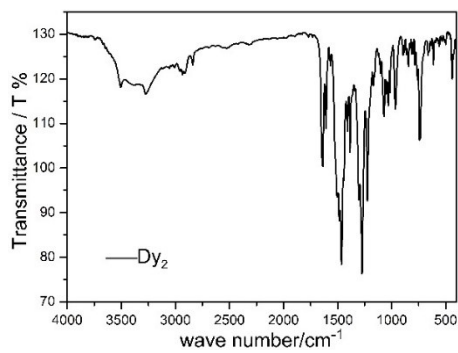

**Fig. S3.** IR spectrum of  $\text{Dy}_2$ .

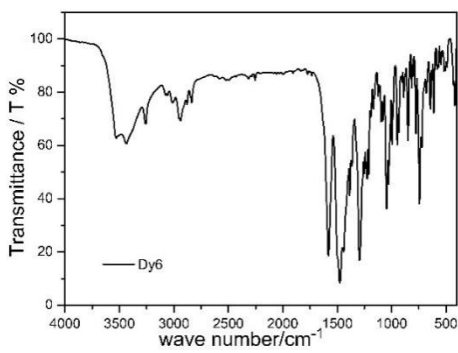

**Fig. S4.** IR spectrum of  $\text{Dy}_6$ .

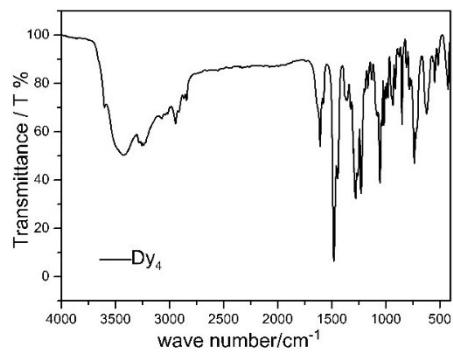

**Fig. S5.** IR spectrum of Dy<sub>4</sub>.

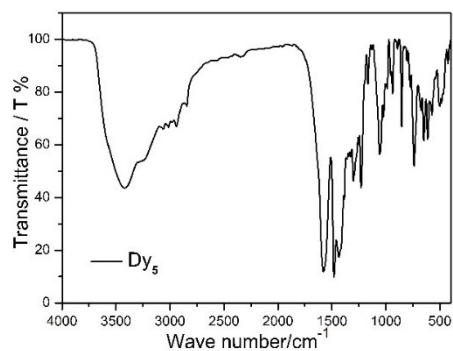

**Fig. S6.** IR spectrum of Dy<sub>5</sub>.

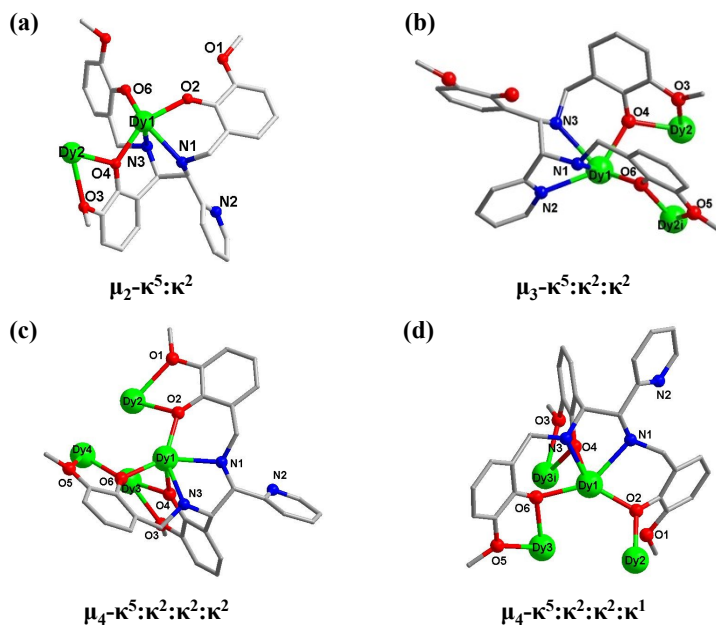

**Fig. S7.** Different coordination modes of H<sub>3</sub>L for complexes: (a) Dy<sub>2</sub>; (b) Dy<sub>4</sub>; (c) Dy<sub>5</sub>; (d) Dy<sub>6</sub>.

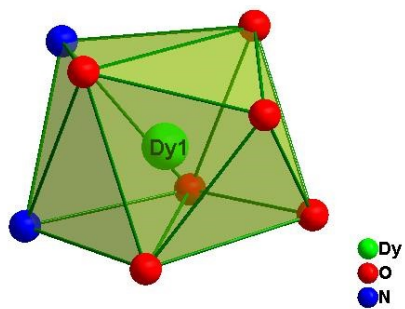

Fig. S8. Coordination polyhedron surrounding of Dy(III) for  $Dy_2$ .

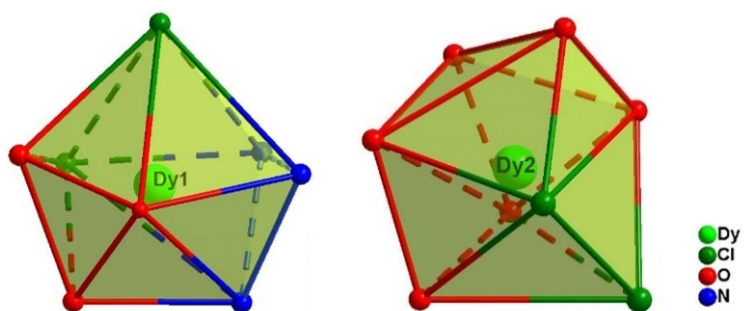

Fig.S9. Coordination polyhedron surrounding of Dy(III) for  $Dy_4$ .

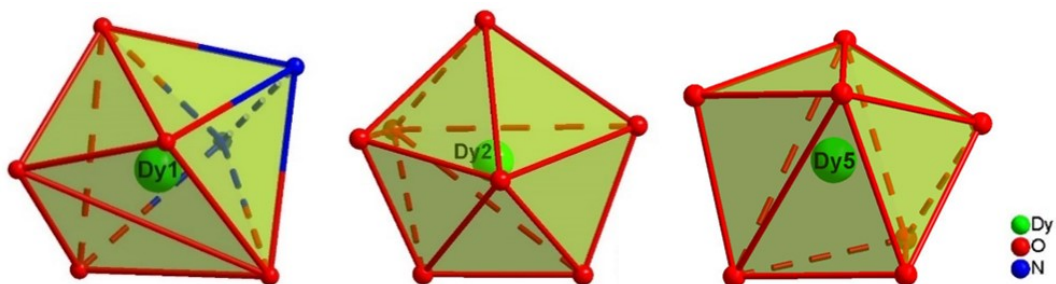

Fig. S10. Coordination polyhedron surrounding of Dy(III) for  $Dy_5$ .

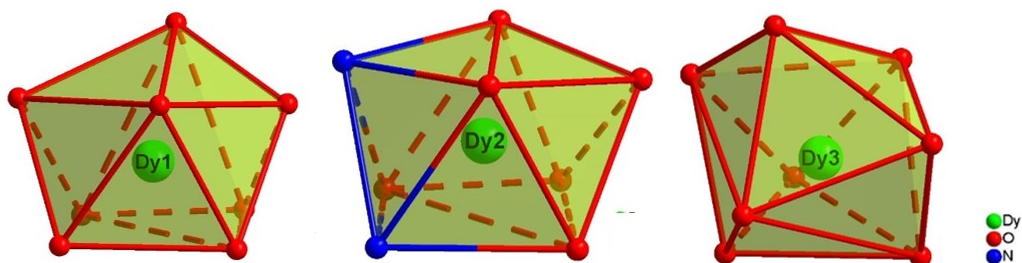

Fig. S11. Coordination polyhedron surrounding of Dy(III) for  $Dy_6$ .



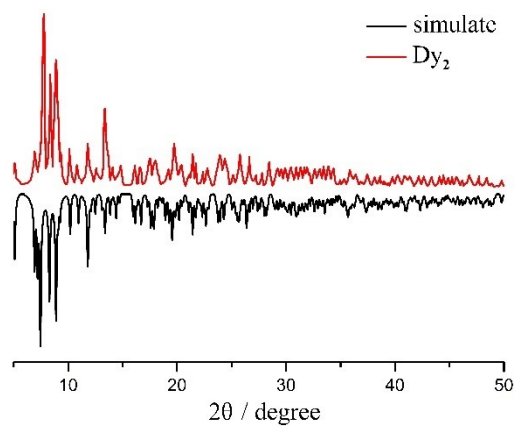

**Fig. S12.** Powder X-ray diffraction pattern of  $\text{Dy}_2$  at room temperature, together with the calculated pattern from the single crystal data.

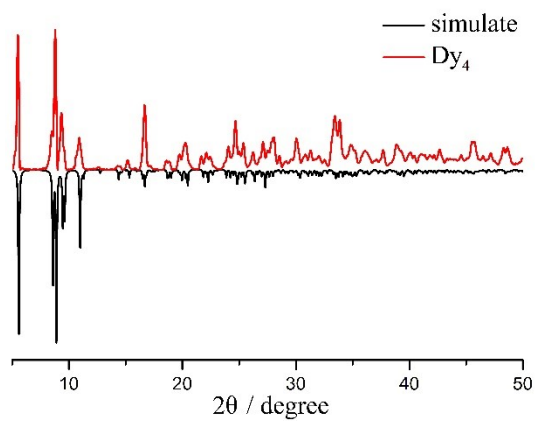

**Fig. S13.** Powder X-ray diffraction pattern of  $\text{Dy}_4$  at room temperature, together with the calculated pattern from the single crystal data.

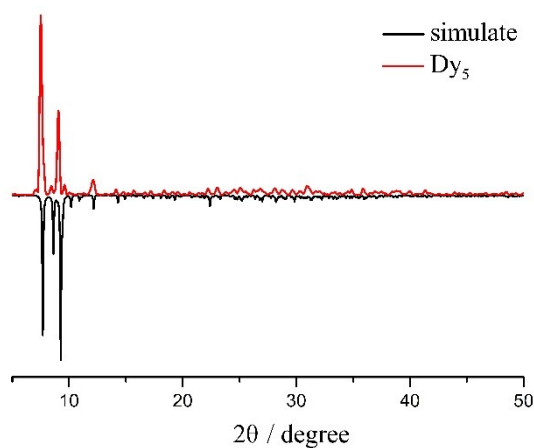

**Fig. S14.** Powder X-ray diffraction pattern of  $\text{Dy}_5$  at room temperature, together with the calculated pattern from the single crystal data.

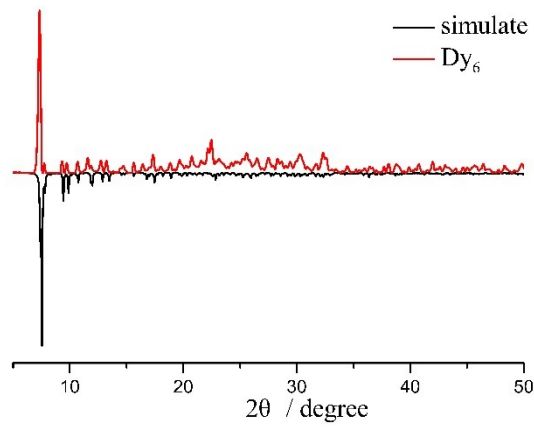

**Fig. S15.** Powder X-ray diffraction pattern of  $\text{Dy}_6$  at room temperature, together with the calculated pattern from the single crystal data.

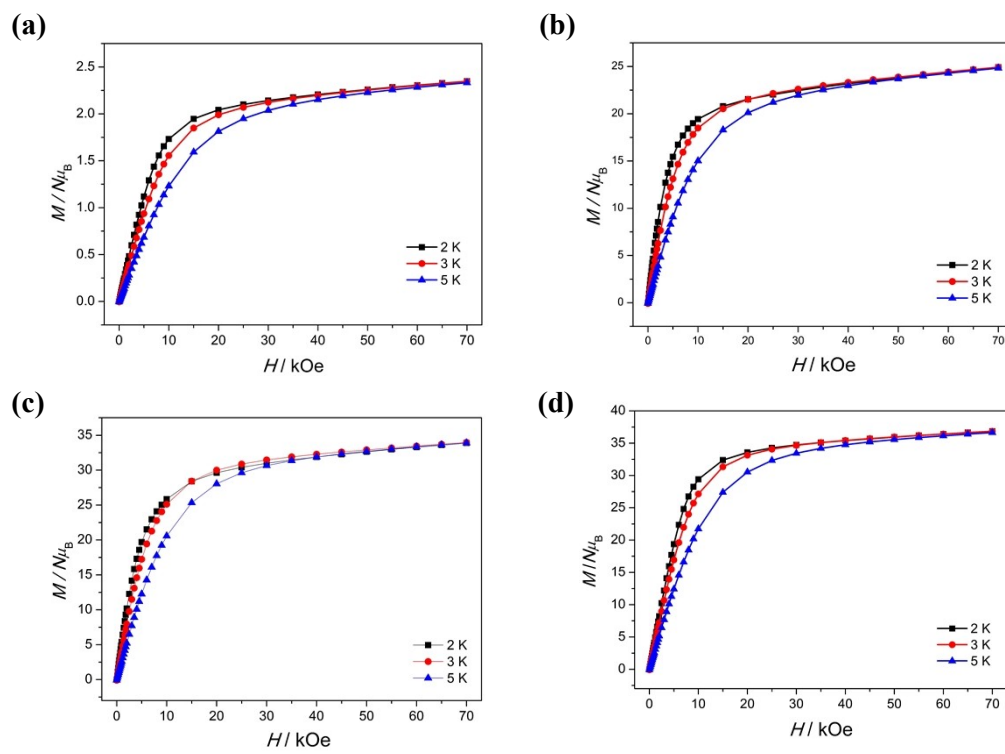

**Fig. S16.**  $M$  versus  $H$  plots under different temperatures for  $\text{Dy}_2$ (a);  $\text{Dy}_4$ (b);  $\text{Dy}_5$ (c) and  $\text{Dy}_6$ (d).

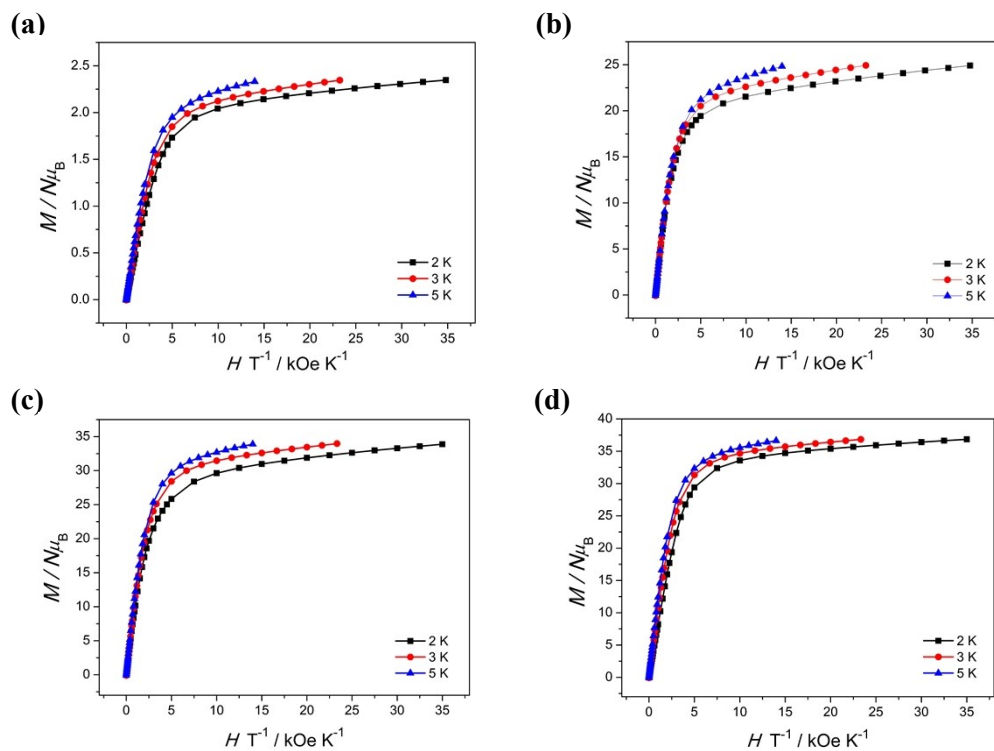

Fig. S17.  $M$  versus  $HT^{-1}$  plots under different temperatures for  $\text{Dy}_2$ (a);  $\text{Dy}_4$ (b);  $\text{Dy}_5$ (c) and  $\text{Dy}_6$ (d).

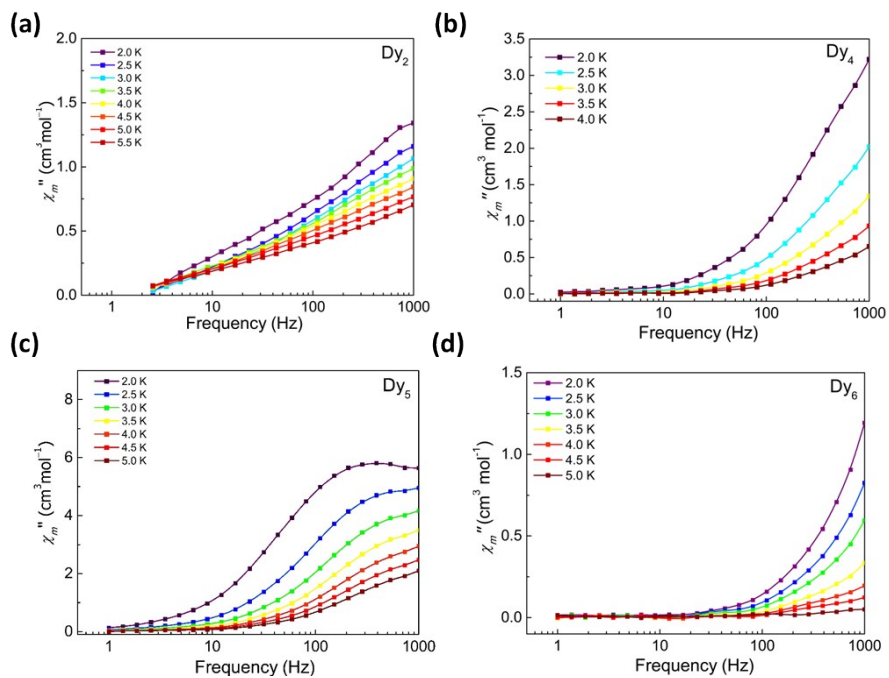

Fig.S18. Frequency dependence of the out-of-phase parts of the ac magnetic susceptibilities for  $\text{Dy}_2$ - $\text{Dy}_6$  collected under a 0 Oe dc field at different temperature.

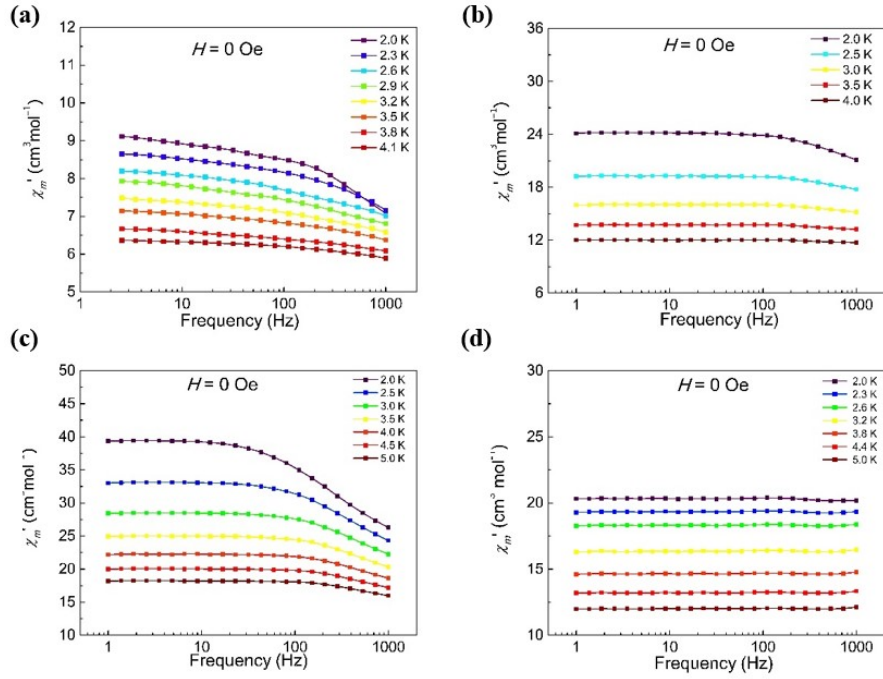

**Fig. S19.** Frequency-dependent in-phase ( $\chi'$ ) ac susceptibilities under different dc fields for **Dy<sub>2</sub>**(a); **Dy<sub>4</sub>**(b); **Dy<sub>5</sub>**(c) and **Dy<sub>6</sub>**(d).

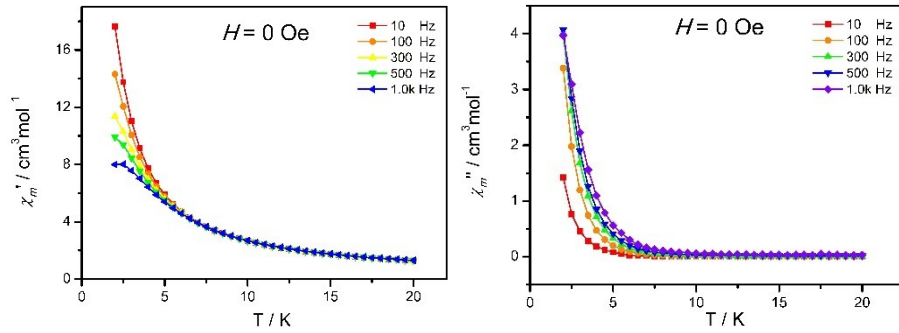

**Fig. S20.** Plots of in-phase ac susceptibilities ( $\chi'$ ) and out-of-phase ac susceptibilities ( $\chi''$ ) vs  $T$  at various frequencies under zero dc field for **Dy<sub>2</sub>**.

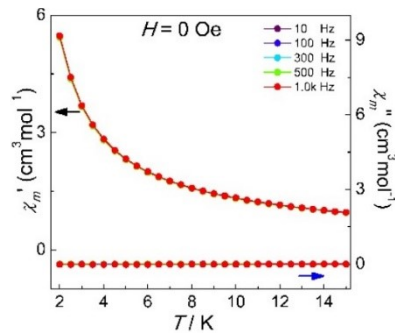

**Fig. S21.** Plots of in-phase ac susceptibilities ( $\chi'$ ) and out-of-phase ac susceptibilities ( $\chi''$ ) vs  $T$  at various frequencies under zero dc field for **Dy<sub>4</sub>**.

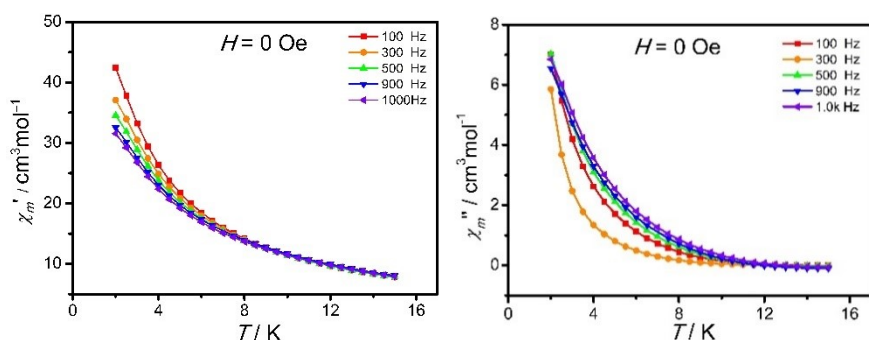

**Fig. S22.** Plots of in-phase ac susceptibilities ( $\chi'$ ) and out-of-phase ac susceptibilities ( $\chi''$ ) vs  $T$  at various frequencies under zero dc field for **Dy<sub>5</sub>**.

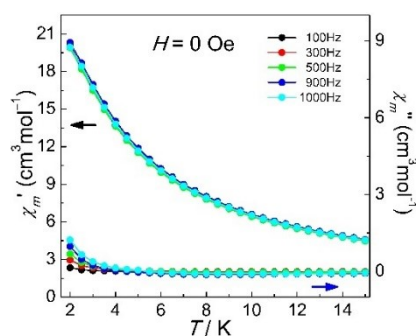

**Fig. S23.** Plots of in-phase ac susceptibilities ( $\chi'$ ) and out-of-phase ac susceptibilities ( $\chi''$ ) vs  $T$  at various frequencies under zero dc field for **Dy<sub>6</sub>**.

**Table S2.** Detailed analysis results of the Continuous Shape Measures (CShMs).

| Lable                        | Dy1( <b>Dy<sub>2</sub></b> ) | Dy1( <b>Dy<sub>4</sub></b> ) | Dy2( <b>Dy<sub>4</sub></b> ) | Dy2( <b>Dy<sub>5</sub></b> ) | Dy1( <b>Dy<sub>6</sub></b> ) | Dy2( <b>Dy<sub>6</sub></b> ) | Dy3( <b>Dy<sub>6</sub></b> ) |
|------------------------------|------------------------------|------------------------------|------------------------------|------------------------------|------------------------------|------------------------------|------------------------------|
| OP-8                         | 29.23047                     | 32.29623                     | 31.30788                     | 30.3577                      | 29.65111                     | 27.42542                     | 30.48133                     |
| HPY-8                        | 24.31967                     | 22.51962                     | 22.03174                     | 23.69403                     | 21.08121                     | 21.89232                     | 23.06941                     |
| HBPY-8                       | 13.25771                     | 15.06596                     | 13.93922                     | 16.45093                     | 15.21084                     | 16.96335                     | 13.3407                      |
| CU-8                         | 9.20705                      | 10.77227                     | 10.08064                     | 11.65697                     | 11.50213                     | 10.33813                     | 12.21268                     |
| SAPR-8                       | 1.70037                      | 3.0317                       | <b>1.61977</b>               | 3.23357                      | 2.85824                      | <b>0.9402</b>                | 3.94187                      |
| TDD-8                        | 2.41308                      | <b>1.15535</b>               | 3.51181                      | <b>0.58858</b>               | 2.13226                      | 1.64063                      | <b>2.64899</b>               |
| JGBF-8                       | 10.31022                     | 14.76593                     | 13.46929                     | 11.99969                     | 13.14462                     | 14.09724                     | 11.36332                     |
| JETBPY-8                     | 26.93511                     | 27.36783                     | 26.77363                     | 28.17948                     | 25.05975                     | 26.18359                     | 27.65307                     |
| JBTPR-8                      | <b>1.6368</b>                | 3.16298                      | 3.18366                      | 2.64982                      | 2.61596                      | 1.65911                      | 3.74059                      |
| BTPR-8                       | 1.65719                      | 2.45899                      | 2.50345                      | 2.50636                      | <b>1.88203</b>               | 1.58007                      | 3.06713                      |
| JSD-8                        | 2.79538                      | 4.09921                      | 5.10584                      | 1.70345                      | 4.45543                      | 3.26181                      | 3.63779                      |
| TT-8                         | 10.0414                      | 11.1023                      | 10.9095                      | 12.1647                      | 12.27688                     | 10.85012                     | 12.91911                     |
| ETBPY-8                      | 22.29112                     | 23.65115                     | 21.2465                      | 25.67421                     | 21.36824                     | 23.1605                      | 22.32888                     |
| Lable                        | HP-87                        | HPY-7                        | PBPY-7                       | CO-7                         | CTPR-7                       | JBPY-7                       | ETBPY-7                      |
| Dy1( <b>Dy<sub>5</sub></b> ) | 32.63884                     | 21.88278                     | 4.00485                      | 1.88208                      | <b>1.09248</b>               | 6.78972                      | 19.19307                     |
| Dy5( <b>Dy<sub>5</sub></b> ) | 33.3318                      | 19.90714                     | 6.82857                      | <b>0.36874</b>               | 1.1934                       | 9.96678                      | 19.15061                     |

**Table S3.** Selected bond lengths / Å and bond angles / ° for **Dy<sub>2</sub>**.

Bond Length/Å

|         |           |         |           |         |           |
|---------|-----------|---------|-----------|---------|-----------|
| Dy1—Dy2 | 3.792 (5) | Dy1—O13 | 2.349 (5) | Dy2—O9  | 2.503 (5) |
| Dy1—O4  | 2.398 (4) | Dy1—N6  | 2.522 (5) | Dy2—O10 | 2.405 (4) |
| Dy1—O3  | 2.509 (5) | Dy1—N4  | 2.528 (6) | Dy2—O14 | 2.361 (5) |
| Dy1—O10 | 2.300 (4) | Dy2—O2  | 2.264 (5) | Dy2—N1  | 2.536 (5) |
| Dy1—O8  | 2.269 (5) | Dy2—O4  | 2.306 (5) | Dy2—N3  | 2.510 (5) |
| Dy1—O12 | 2.264 (5) | Dy2—O6  | 2.245 (5) |         |           |

### Bond Angles(°)

|             |             |             |             |             |             |
|-------------|-------------|-------------|-------------|-------------|-------------|
| O4—Dy1—O3   | 65.74 (15)  | O12—Dy1—O8  | 89.9 (2)    | O4—Dy2—N3   | 71.37 (17)  |
| O4—Dy1—N6   | 123.60 (17) | O12—Dy1—O13 | 149.23 (17) | O6—Dy2—O2   | 86.09 (19)  |
| O4—Dy1—N4   | 137.67 (18) | O12—Dy1—N6  | 72.83 (18)  | O6—Dy2—O4   | 109.75 (17) |
| O3—Dy1—N6   | 144.39 (18) | O12—Dy1—N4  | 138.06 (17) | O6—Dy2—O9   | 77.32 (18)  |
| O3—Dy1—N4   | 130.67 (18) | O13—Dy1—O4  | 75.64 (16)  | O6—Dy2—O10  | 78.45 (17)  |
| O10—Dy1—O4  | 72.17 (15)  | O13—Dy1—O3  | 77.60 (18)  | O6—Dy2—O14  | 151.34 (18) |
| O10—Dy1—O3  | 135.92 (14) | O13—Dy1—N6  | 136.57 (19) | O6—Dy2—N1   | 135.25 (18) |
| O10—Dy1—O13 | 80.02 (17)  | O13—Dy1—N4  | 72.40 (18)  | O6—Dy2—N3   | 72.73 (18)  |
| O10—Dy1—N6  | 72.04 (17)  | N6—Dy1—N4   | 68.90 (19)  | O9—Dy2—N1   | 130.32 (17) |
| O10—Dy1—N4  | 75.56 (19)  | O2—Dy2—O4   | 150.36 (17) | O9—Dy2—N3   | 146.59 (18) |
| O8—Dy1—O4   | 139.32 (19) | O2—Dy2—O9   | 72.44 (17)  | O10—Dy2—O9  | 65.33 (15)  |
| O8—Dy1—O3   | 73.64 (18)  | O2—Dy2—O10  | 137.20 (17) | O10—Dy2—N1  | 141.15 (17) |
| O8—Dy1—O10  | 147.4 (2)   | O2—Dy2—O14  | 99.76 (18)  | O10—Dy2—N3  | 121.08 (16) |
| O8—Dy1—O13  | 98.17 (18)  | O2—Dy2—N1   | 74.16 (18)  | O14—Dy2—O9  | 77.83 (18)  |
| O8—Dy1—N6   | 88.81 (19)  | O2—Dy2—N3   | 90.89 (19)  | O14—Dy2—O10 | 78.38 (15)  |
| O8—Dy1—N4   | 73.0 (2)    | O4—Dy2—O9   | 134.30 (16) | O14—Dy2—N1  | 72.81 (17)  |
| O12—Dy1—O4  | 78.91 (16)  | O4—Dy2—O10  | 71.95 (15)  | O14—Dy2—N3  | 134.59 (18) |
| O12—Dy1—O3  | 76.35 (17)  | O4—Dy2—O14  | 78.50 (17)  | N3—Dy2—N1   | 67.98 (17)  |
| O12—Dy1—O10 | 108.28 (17) | O4—Dy2—N1   | 77.15 (17)  | □           | □           |

**Table S4.** Selected bond lengths / Å and bond angles / ° for Dy<sub>4</sub>

### Bond Length/Å

|          |             |          |             |         |           |
|----------|-------------|----------|-------------|---------|-----------|
| Dy1—Dy2  | 3.8533 (3)  | Dy1—N1   | 2.484 (3)   | Dy2—O7  | 2.312 (3) |
| Dy1—Dy2i | 3.6063 (3)  | Dy1—N3   | 2.600 (4)   | Dy2—O7i | 2.400 (2) |
| Dy1—Cl2  | 2.7548 (11) | Dy1—N2   | 2.550 (4)   | Dy2—O2i | 2.349 (3) |
| Dy1—Cl1  | 2.6536 (12) | Dy2—Dy2i | 3.8600 (4)  | Dy2—O6  | 2.316 (3) |
| Dy1—O7i  | 2.371 (3)   | Dy2—Cl2i | 2.8300 (12) | Dy2—O1i | 2.454 (3) |
| Dy1—O2   | 2.350 (3)   | Dy2—Cl3  | 2.6433 (13) | Dy2—O5  | 2.539 (3) |
| Dy1—O6   | 2.309 (3)   |          |             |         |           |

### Bond Angles(°)

|                          |             |            |            |                                       |             |
|--------------------------|-------------|------------|------------|---------------------------------------|-------------|
| Cl1—Dy1—Cl2              | 87.53 (4)   | N1—Dy1—Cl2 | 100.07 (8) | O7 <sup>i</sup> —Dy2—O5               | 113.78 (9)  |
| O7 <sup>i</sup> —Dy1—Cl2 | 74.02 (7)   | N1—Dy1—Cl1 | 140.56 (9) | O7—Dy2—O5                             | 80.43 (10)  |
| O7 <sup>i</sup> —Dy1—Cl1 | 78.57 (7)   | N1—Dy1—N3  | 68.29 (11) | O2 <sup>i</sup> —Dy2—Cl2 <sup>i</sup> | 71.71 (7)   |
| O7 <sup>i</sup> —Dy1—N1  | 140.80 (11) | N1—Dy1—N2  | 64.78 (11) | O2 <sup>i</sup> —Dy2—Cl3              | 113.50 (8)  |
| O7 <sup>i</sup> —Dy1—N3  | 137.18 (10) | N3—Dy1—Cl2 | 143.08 (8) | O2 <sup>i</sup> —Dy2—O7 <sup>i</sup>  | 76.98 (9)   |
| O7 <sup>i</sup> —Dy1—N2  | 143.38 (10) | N3—Dy1—Cl1 | 82.43 (8)  | O2 <sup>i</sup> —Dy2—O1 <sup>i</sup>  | 66.08 (10)  |
| O2—Dy1—Cl2               | 73.13 (7)   | N2—Dy1—Cl2 | 75.57 (8)  | O2 <sup>i</sup> —Dy2—O5               | 144.32 (10) |
| O2—Dy1—Cl1               | 146.84 (7)  | N2—Dy1—Cl1 | 80.22 (9)  | O6—Dy2—Cl2 <sup>i</sup>               | 143.48 (7)  |
| O2—Dy1—O7 <sup>i</sup>   | 70.42 (9)   | N2—Dy1—N3  | 67.75 (11) | O6—Dy2—Cl3                            | 87.20 (8)   |

|                        |             |                                       |             |                                       |             |
|------------------------|-------------|---------------------------------------|-------------|---------------------------------------|-------------|
| O2—Dy1—N1              | 70.82 (10)  | Cl3—Dy2—Cl2 <sup>i</sup>              | 79.85 (4)   | O6—Dy2—O7 <sup>i</sup>                | 68.85 (9)   |
| O2—Dy1—N3              | 128.81 (10) | O7 <sup>i</sup> —Dy2—Cl2 <sup>i</sup> | 137.63 (7)  | O6—Dy2—O2 <sup>i</sup>                | 143.95 (9)  |
| O2—Dy1—N2              | 118.83 (11) | O7—Dy2—Cl2 <sup>i</sup>               | 73.39 (7)   | O6—Dy2—O1 <sup>i</sup>                | 92.39 (10)  |
| O6—Dy1—Cl2             | 142.02 (7)  | O7 <sup>i</sup> —Dy2—Cl3              | 140.01 (8)  | O6—Dy2—O5                             | 64.58 (10)  |
| O6—Dy1—Cl1             | 95.09 (8)   | O7—Dy2—Cl3                            | 149.63 (7)  | O1 <sup>i</sup> —Dy2—Cl2 <sup>i</sup> | 117.23 (8)  |
| O6—Dy1—O7 <sup>i</sup> | 69.46 (9)   | O7—Dy2—O7 <sup>i</sup>                | 70.00 (11)  | O1 <sup>i</sup> —Dy2—Cl3              | 77.06 (7)   |
| O6—Dy1—O2              | 85.01 (10)  | O7—Dy2—O2 <sup>i</sup>                | 71.45 (9)   | O1 <sup>i</sup> —Dy2—O5               | 148.80 (10) |
| O6—Dy1—N1              | 101.52 (10) | O7—Dy2—O6                             | 105.88 (10) | O5—Dy2—Cl2 <sup>i</sup>               | 79.63 (8)   |
| O6—Dy1—N3              | 74.50 (10)  | O7 <sup>i</sup> —Dy2—O1 <sup>i</sup>  | 72.66 (9)   | O5—Dy2—Cl3                            | 80.87 (8)   |
| O6—Dy1—N2              | 142.25 (11) | O7—Dy2—O1 <sup>i</sup>                | 128.19 (9)  | □                                     | □           |

Symmetry code: (i)  $-x+1, -y+1, -z$ .

**Table S5.** Selected bond lengths / Å and bond angles / ° for Dy<sub>5</sub>

| Bond Length/Å  |             |             |             |                      |             |
|----------------|-------------|-------------|-------------|----------------------|-------------|
| Dy1—O4         | 2.270 (5)   | Dy3—Dy1     | 3.6562 (6)  | Dy4—O14              | 2.365 (6)   |
| Dy1—O2         | 2.273 (6)   | Dy3—O22     | 2.325 (6)   | Dy4—O3               | 2.499 (5)   |
| Dy1—O7         | 2.230 (5)   | Dy3—O7      | 2.269 (5)   | Dy4—O9               | 2.487 (5)   |
| Dy1—O6         | 2.280 (6)   | Dy3—O10     | 2.426 (5)   | Dy4—O15              | 2.327 (6)   |
| Dy1—O23        | 2.279 (6)   | Dy3—O6      | 2.328 (5)   | Dy4—Dy2              | 3.6228 (6)  |
| Dy1—N1         | 2.407 (7)   | Dy3—O12     | 2.328 (6)   | Dy4—O8               | 2.418 (5)   |
| Dy1—N3         | 2.496 (7)   | Dy3—O13     | 2.387 (6)   | Dy5—Dy3              | 3.7743 (6)  |
| Dy1—Dy2        | 3.6440 (6)  | Dy3—O5      | 2.582 (6)   | Dy5—O10              | 2.323 (5)   |
| Dy2—O2         | 2.431 (5)   | Dy3—Dy2     | 3.7136 (6)  | Dy5—O19              | 2.321 (6)   |
| Dy2—O7         | 2.202 (5)   | Dy3—O8      | 2.359 (5)   | Dy5—O24 <sup>i</sup> | 2.321 (5)   |
| Dy2—O10        | 2.507 (6)   | Dy4—Dy5     | 3.8409 (6)  | Dy5—O17              | 2.386 (6)   |
| Dy2—O16        | 2.348 (6)   | Dy4—Dy3     | 3.5720 (6)  | Dy5—O21              | 2.348 (6)   |
| Dy2—O11        | 2.339 (6)   | Dy4—Dy1     | 3.6463 (6)  | Dy5—O9               | 2.284 (5)   |
| Dy2—O9         | 2.435 (5)   | Dy4—O4      | 2.403 (5)   | Dy5—Dy2              | 3.8228 (6)  |
| Dy2—O1         | 2.556 (6)   | Dy4—O18     | 2.280 (5)   | Dy5—O8               | 2.296 (5)   |
| Dy2—O20        | 2.307 (6)   | Dy4—O7      | 2.224 (5)   |                      |             |
| Bond Angles(°) |             |             |             |                      |             |
| O4—Dy1—O2      | 107.3 (2)   | O9—Dy2—O1   | 134.80 (19) | O18—Dy4—O15          | 95.5 (2)    |
| O4—Dy1—O6      | 93.8 (2)    | O20—Dy2—O2  | 140.6 (2)   | O18—Dy4—O8           | 77.78 (19)  |
| O4—Dy1—O23     | 155.19 (19) | O20—Dy2—O10 | 78.4 (2)    | O7—Dy4—O4            | 72.53 (18)  |
| O4—Dy1—N1      | 80.3 (2)    | O20—Dy2—O16 | 95.0 (2)    | O7—Dy4—O18           | 144.12 (18) |
| O4—Dy1—N3      | 76.8 (2)    | O20—Dy2—O11 | 93.9 (2)    | O7—Dy4—O14           | 94.2 (2)    |
| O2—Dy1—O6      | 134.1 (2)   | O20—Dy2—O9  | 82.6 (2)    | O7—Dy4—O3            | 137.10 (18) |
| O2—Dy1—O23     | 87.7 (2)    | O20—Dy2—O1  | 76.8 (2)    | O7—Dy4—O9            | 72.56 (18)  |
| O2—Dy1—N1      | 76.7 (2)    | O22—Dy3—O10 | 79.80 (19)  | O7—Dy4—O15           | 93.8 (2)    |
| O2—Dy1—N3      | 145.8 (2)   | O22—Dy3—O6  | 140.82 (19) | O7—Dy4—O8            | 73.58 (19)  |
| O7—Dy1—O4      | 75.05 (18)  | O22—Dy3—O12 | 101.4 (2)   | O14—Dy4—O4           | 73.84 (19)  |
| O7—Dy1—O2      | 74.73 (19)  | O22—Dy3—O13 | 84.8 (2)    | O14—Dy4—O3           | 77.20 (19)  |
| O7—Dy1—O6      | 72.00 (19)  | O22—Dy3—O5  | 79.3 (2)    | O14—Dy4—O9           | 140.49 (18) |
| O7—Dy1—O23     | 128.9 (2)   | O22—Dy3—O8  | 82.45 (19)  | O14—Dy4—O8           | 72.58 (18)  |
| O7—Dy1—N1      | 134.2 (2)   | O7—Dy3—O22  | 148.28 (19) | O9—Dy4—O3            | 137.19 (18) |
| O7—Dy1—N3      | 136.8 (2)   | O7—Dy3—O10  | 72.54 (18)  | O15—Dy4—O4           | 76.6 (2)    |
| O6—Dy1—N1      | 148.4 (2)   | O7—Dy3—O6   | 70.42 (18)  | O15—Dy4—O14          | 145.3 (2)   |

|             |             |             |             |                           |             |
|-------------|-------------|-------------|-------------|---------------------------|-------------|
| O6—Dy1—N3   | 77.9 (2)    | O7—Dy3—O12  | 87.1 (2)    | O15—Dy4—O3                | 74.0 (2)    |
| O23—Dy1—O6  | 89.3 (2)    | O7—Dy3—O13  | 107.13 (19) | O15—Dy4—O9                | 73.90 (19)  |
| O23—Dy1—N1  | 84.3 (2)    | O7—Dy3—O5   | 131.88 (19) | O15—Dy4—O8                | 141.86 (19) |
| O23—Dy1—N3  | 79.8 (2)    | O7—Dy3—O8   | 73.95 (18)  | O8—Dy4—O3                 | 138.52 (19) |
| N1—Dy1—N3   | 70.5 (2)    | O10—Dy3—O5  | 135.91 (18) | O8—Dy4—O9                 | 68.00 (17)  |
| O2—Dy2—O10  | 132.89 (19) | O6—Dy3—O10  | 137.0 (2)   | O10—Dy5—O17               | 147.32 (18) |
| O2—Dy2—O9   | 126.62 (19) | O6—Dy3—O12  | 80.7 (2)    | O10—Dy5—O21               | 81.2 (2)    |
| O2—Dy2—O1   | 63.78 (19)  | O6—Dy3—O13  | 72.0 (2)    | O19—Dy5—O10               | 77.7 (2)    |
| O7—Dy2—O2   | 72.12 (19)  | O6—Dy3—O5   | 64.46 (19)  | O19—Dy5—O17               | 123.3 (2)   |
| O7—Dy2—O10  | 72.06 (18)  | O6—Dy3—O8   | 117.86 (18) | O19—Dy5—O21               | 115.2 (2)   |
| O7—Dy2—O16  | 99.6 (2)    | O12—Dy3—O10 | 76.4 (2)    | O24 <sup>i</sup> —Dy5—O10 | 134.54 (19) |
| O7—Dy2—O11  | 91.9 (2)    | O12—Dy3—O13 | 142.2 (2)   | O24 <sup>i</sup> —Dy5—O19 | 74.7 (2)    |
| O7—Dy2—O9   | 73.97 (18)  | O12—Dy3—O5  | 70.3 (2)    | O24 <sup>i</sup> —Dy5—O17 | 77.9 (2)    |
| O7—Dy2—O1   | 135.90 (19) | O12—Dy3—O8  | 145.3 (2)   | O24 <sup>i</sup> —Dy5—O21 | 78.9 (2)    |
| O7—Dy2—O20  | 147.2 (2)   | O13—Dy3—O10 | 141.0 (2)   | O21—Dy5—O17               | 106.6 (2)   |
| O10—Dy2—O1  | 141.41 (19) | O13—Dy3—O5  | 74.4 (2)    | O9—Dy5—O10                | 75.22 (19)  |
| O16—Dy2—O2  | 73.7 (2)    | O8—Dy3—O10  | 70.33 (17)  | O9—Dy5—O19                | 80.7 (2)    |
| O16—Dy2—O10 | 142.04 (19) | O8—Dy3—O13  | 72.2 (2)    | O9—Dy5—O24 <sup>i</sup>   | 133.10 (19) |
| O16—Dy2—O9  | 72.76 (19)  | O8—Dy3—O5   | 143.1 (2)   | O9—Dy5—O17                | 83.5 (2)    |
| O16—Dy2—O1  | 69.5 (2)    | O4—Dy4—O3   | 64.67 (18)  | O9—Dy5—O21                | 147.99 (19) |
| O11—Dy2—O2  | 76.8 (2)    | O4—Dy4—O9   | 131.92 (18) | O9—Dy5—O8                 | 73.59 (18)  |
| O11—Dy2—O10 | 74.9 (2)    | O4—Dy4—O8   | 129.55 (18) | O8—Dy5—O10                | 73.27 (18)  |
| O11—Dy2—O16 | 143.1 (2)   | O18—Dy4—O4  | 143.35 (19) | O8—Dy5—O19                | 145.11 (19) |
| O11—Dy2—O9  | 144.0 (2)   | O18—Dy4—O14 | 97.4 (2)    | O8—Dy5—O24 <sup>i</sup>   | 140.16 (19) |
| O11—Dy2—O1  | 77.8 (2)    | O18—Dy4—O3  | 78.71 (19)  | O8—Dy5—O17                | 77.1 (2)    |
| O9—Dy2—O10  | 69.34 (17)  | O18—Dy4—O9  | 76.97 (19)  | O8—Dy5—O21                | 79.16 (19)  |

Symmetry codes: (i)  $x+1/2, -y+3/2, z+1/2$ ; (ii)  $x-1/2, -y+3/2, z-1/2$ .

**Table S6.** Selected bond lengths / Å and bond angles / ° for **Dy<sub>6</sub>**.

| Bond Length/Å  |             |                        |             |             |            |
|----------------|-------------|------------------------|-------------|-------------|------------|
| Dy1—O2         | 2.279 (5)   | Dy1—Dy2i               | 3.7825 (5)  | Dy2—Dy2i    | 3.6276 (6) |
| Dy1—O6         | 2.282 (5)   | Dy2—O8                 | 2.305 (5)   | Dy3—O10     | 2.280 (6)  |
| Dy1—O8         | 2.323 (4)   | Dy2—O9                 | 2.322 (5)   | Dy3—O16     | 2.285 (6)  |
| Dy1—O15        | 2.342 (5)   | Dy2—O8i                | 2.334 (4)   | Dy3—O2      | 2.298 (5)  |
| Dy1—O4         | 2.369 (5)   | Dy2—O4i                | 2.359 (5)   | Dy3—O7      | 2.348 (5)  |
| Dy1—N3         | 2.466 (6)   | Dy2—O7                 | 2.375 (5)   | Dy3—O13     | 2.429 (6)  |
| Dy1—N1         | 2.483 (5)   | Dy2—O6                 | 2.41 (5)    | Dy3—O12     | 2.440 (6)  |
| Dy1—O7         | 2.526 (5)   | Dy2—O3i                | 2.452 (5)   | Dy3—O11     | 2.463 (6)  |
| Dy1—Dy2        | 3.5181 (5)  | Dy2—O5                 | 2.499 (5)   | Dy3—O14     | 2.509 (6)  |
| Dy1—Dy3        | 3.7375 (5)  |                        |             |             |            |
| Bond Angles(°) |             |                        |             |             |            |
| O2—Dy1—O6      | 135.28 (17) | O8—Dy2—O9              | 77.95 (17)  | O10—Dy3—O16 | 155.9 (2)  |
| O2—Dy1—O8      | 78.63 (16)  | O8—Dy2—O8 <sup>i</sup> | 77.12 (17)  | O10—Dy3—O2  | 106.7 (2)  |
| O6—Dy1—O8      | 69.78 (16)  | O9—Dy2—O8 <sup>i</sup> | 122.91 (18) | O16—Dy3—O2  | 88.8 (2)   |



|            |             |                                      |             |             |             |
|------------|-------------|--------------------------------------|-------------|-------------|-------------|
| O2—Dy1—O15 | 84.97 (18)  | O8—Dy2—O4 <sup>i</sup>               | 117.20 (16) | O10—Dy3—O7  | 85.86 (19)  |
| O6—Dy1—O15 | 106.3 (2)   | O9—Dy2—O4 <sup>i</sup>               | 79.09 (17)  | O16—Dy3—O7  | 80.70 (19)  |
| O8—Dy1—O15 | 148.89 (18) | O8 <sup>i</sup> —Dy2—O4 <sup>i</sup> | 68.53 (15)  | O2—Dy3—O7   | 73.95 (17)  |
| O2—Dy1—O4  | 114.31 (17) | O8—Dy2—O7                            | 75.2 (16)   | O10—Dy3—O13 | 76.1 (2)    |
| O6—Dy1—O4  | 82.88 (17)  | O9—Dy2—O7                            | 80.04 (17)  | O16—Dy3—O13 | 124.8 (2)   |
| O8—Dy1—O4  | 68.53 (15)  | O8 <sup>i</sup> —Dy2—O7              | 138.57 (16) | O2—Dy3—O13  | 84.4 (2)    |
| O15—Dy1—O4 | 142.56 (18) | O4 <sup>i</sup> —Dy2—O7              | 152.63 (16) | O7—Dy3—O13  | 146.5 (2)   |
| O2—Dy1—N3  | 143.91 (18) | O8—Dy2—O6                            | 68.05 (16)  | O10—Dy3—O12 | 86.0 (2)    |
| O6—Dy1—N3  | 79.08 (18)  | O9—Dy2—O6                            | 139.37 (18) | O16—Dy3—O12 | 88.8 (2)    |
| O8—Dy1—N3  | 133.56 (17) | O8 <sup>i</sup> —Dy2—O6              | 70.99 (16)  | O2—Dy3—O12  | 151.7 (2)   |
| O15—Dy1—N3 | 72.15 (19)  | O4 <sup>i</sup> —Dy2—O6              | 136.10 (16) | O7—Dy3—O12  | 133.3 (2)   |
| O4—Dy1—N3  | 74.28 (18)  | O7—Dy2—O6                            | 70.42 (16)  | O13—Dy3—O12 | 74.0 (2)    |
| O2—Dy1—N1  | 77.48 (18)  | O8—Dy2—O3 <sup>i</sup>               | 151.25 (17) | O10—Dy3—O11 | 79.8 (2)    |
| O6—Dy1—N1  | 146.48 (18) | O9—Dy2—O3 <sup>i</sup>               | 74.53 (19)  | O16—Dy3—O11 | 78.4 (2)    |
| O8—Dy1—N1  | 121.67 (19) | O8 <sup>i</sup> —Dy2—O3 <sup>i</sup> | 125.48 (17) | O2—Dy3—O11  | 153.9 (2)   |
| O15—Dy1—N1 | 79.3 (2)    | O4 <sup>i</sup> —Dy2—O3 <sup>i</sup> | 65.38 (16)  | O7—Dy3—O11  | 81.5 (2)    |
| O4—Dy1—N1  | 74.54 (18)  | O7—Dy2—O3 <sup>i</sup>               | 92.06 (17)  | O13—Dy3—O11 | 121.5 (2)   |
| N3—Dy1—N1  | 71.2 (2)    | O6—Dy2—O3 <sup>i</sup>               | 132.15 (17) | O12—Dy3—O11 | 51.8 (2)    |
| O2—Dy1—O7  | 70.90 (16)  | O8—Dy2—O5                            | 132.73 (16) | O10—Dy3—O14 | 126.7 (2)   |
| O6—Dy1—O7  | 69.66 (16)  | O9—Dy2—O5                            | 145.40 (18) | O16—Dy3—O14 | 73.9 (2)    |
| O8—Dy1—O7  | 71.86 (16)  | O8 <sup>i</sup> —Dy2—O5              | 84.77 (17)  | O2—Dy3—O14  | 78.0 (2)    |
| O15—Dy1—O7 | 77.87 (18)  | O4 <sup>i</sup> —Dy2—O5              | 95.05 (18)  | O7—Dy3—O14  | 142.21 (19) |
| O4—Dy1—O7  | 137.60 (15) | O7—Dy2—O5                            | 92.16 (18)  | O13—Dy3—O14 | 51.1 (2)    |
| N3—Dy1—O7  | 127.85 (18) | O6—Dy2—O5                            | 64.80 (17)  | O12—Dy3—O14 | 74.2 (2)    |
| N1—Dy1—O7  | 142.24 (17) | O3 <sup>i</sup> —Dy2—O5              | 72.12 (18)  | O11—Dy3—O14 | 119.0 (2)   |

---

Symmetry code: (i) -x+1, -y+1, -z+1.
